# Supplementary material
Source: MDPI journal article supplement (https://www.mdpi.com/1999-4907/10/8/677)
Supplement: s1 [file s1]

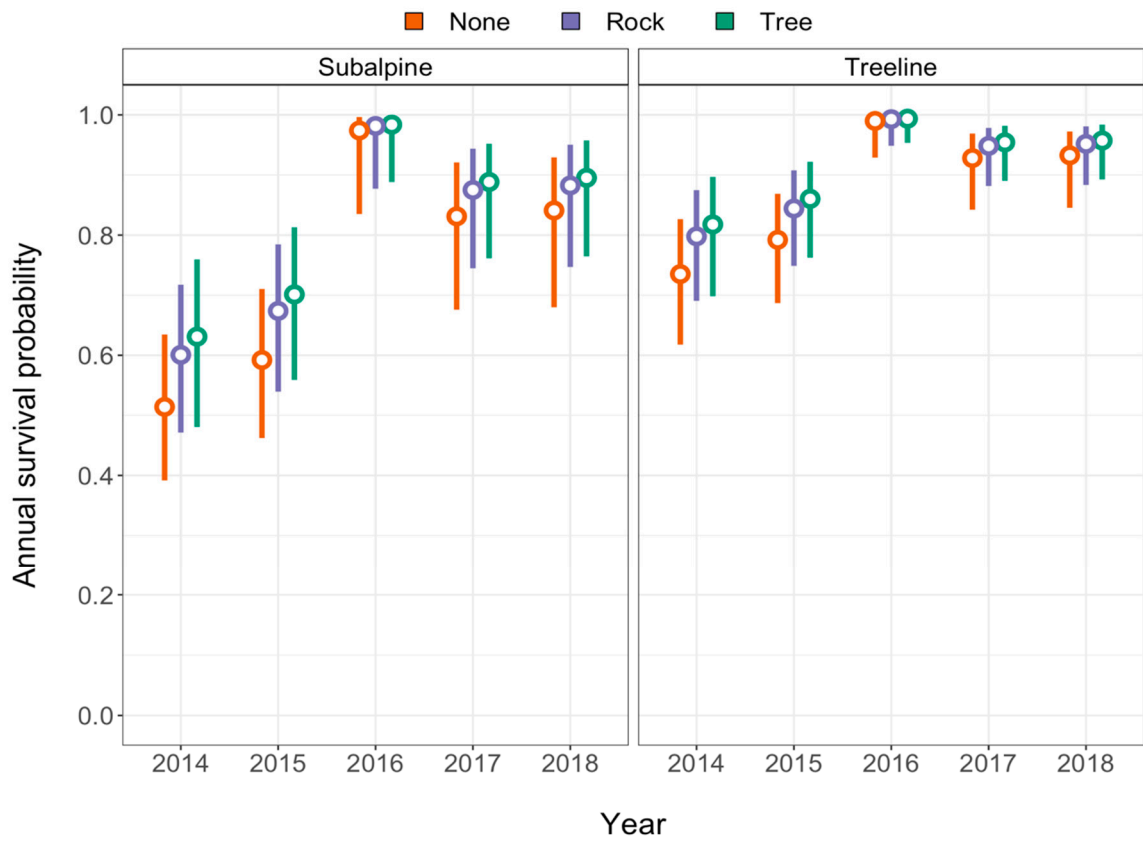

**Figure S1:** Annual survival probability of directly sown whitebark pine seeds on Tibbs Butte, Shoshone National Forest, Wyoming, USA as described by the additive effects of elevation zone (subalpine forest, treeline), year (2014, 2015, 2016, 2017, 2018), and nurse object (rock, tree, none). Points show annual survival estimates, and lines show 95% confidence intervals.
